# Supplementary material for: Barriers and Facilitators for Information Exchange during Over-The-Counter Consultations in Community Pharmacy: A Focus Group Study
Source: MDPI journal article supplement (doi:10.3390/pharmacy5040065), 2017-12-06
Supplement: s1 [file s1]

## Supplementary file 1

**Table 1.** Mapping of COM-B components to the Theoretical Domains Framework[1]

| COM-B component      | Domain (definition)                                                                                                                                                                                                                      | Constructs                                                                                                                                                                                      |
|----------------------|------------------------------------------------------------------------------------------------------------------------------------------------------------------------------------------------------------------------------------------|-------------------------------------------------------------------------------------------------------------------------------------------------------------------------------------------------|
| <b>CAPABILITY</b>    |                                                                                                                                                                                                                                          |                                                                                                                                                                                                 |
| <b>Physical</b>      | <b>Physical skills</b><br>(An ability or proficiency acquired through practice)                                                                                                                                                          | Skills<br>Skills development<br>Competence<br>Ability<br>Practice<br>Skill assessment                                                                                                           |
| <b>Psychological</b> | <b>Knowledge</b><br>(An awareness of the existence of something)                                                                                                                                                                         | Knowledge (including knowledge of condition/scientific rationale)<br>Procedural knowledge<br>Knowledge of task environment                                                                      |
|                      | <b>Cognitive &amp; interpersonal skills</b><br>(An ability or proficiency acquired through practice)                                                                                                                                     | Skills<br>Skills development<br>Competence<br>Ability<br>Interpersonal skills<br>Practice<br>Skill assessment                                                                                   |
|                      | <b>Memory, attention &amp; decision processes</b><br>(The ability to retain information, focus selectively on aspects of the environment and choose between two or more alternatives)                                                    | Memory<br>Attention<br>Attention control<br>Decision making<br>Cognitive overload/tiredness                                                                                                     |
|                      | <b>Behavioural regulation</b><br>(Anything aimed at managing or changing objectively observed or measured actions)                                                                                                                       | Self-monitoring<br>Breaking habit<br>Action planning                                                                                                                                            |
| <b>OPPORTUNITY</b>   |                                                                                                                                                                                                                                          |                                                                                                                                                                                                 |
| <b>Social</b>        | <b>Social influences</b><br>(Those interpersonal processes that can cause individuals to change their thoughts, feelings, or behaviours)                                                                                                 | Social pressure<br>Social norms<br>Group conformity<br>Social comparisons                                                                                                                       |
| <b>Physical</b>      | <b>Environmental context &amp; resources</b><br>(Any circumstance of a person's situation or environment that discourages or encourages the development of skills and abilities, independence, social competence and adaptive behaviour) | Environmental stressors<br>Resources/material resources<br>Organisational culture/climate<br>Salient events/critical incidents<br>Person × environment interaction<br>Barriers and facilitators |
| <b>MOTIVATION</b>    |                                                                                                                                                                                                                                          |                                                                                                                                                                                                 |

|                   |                                                                                                                                                                      |                                                                                                                                                                                              |
|-------------------|----------------------------------------------------------------------------------------------------------------------------------------------------------------------|----------------------------------------------------------------------------------------------------------------------------------------------------------------------------------------------|
| <b>Reflective</b> | <b>Social &amp; professional role &amp; identity</b><br>(A coherent set of behaviours and displayed personal qualities of an individual in a social or work setting) | Professional identity<br>Professional role<br>Social identity<br>Identity<br>Professional boundaries<br>Professional confidence<br>Group identity<br>Leadership<br>Organisational commitment |
|                   | <b>Belief about capabilities</b><br>(Acceptance of the truth, reality or validity about an ability, talent or facility that a person can put to constructive use)    | Self-confidence<br>Perceived competence<br>Self-efficacy<br>Perceived behavioural control<br>Beliefs<br>Self-esteem<br>Empowerment<br>Professional confidence                                |
|                   | <b>Optimism</b><br>(The confidence that things will happen for the best or that desired goals will be attained)                                                      | Optimism<br>Pessimism<br>Unrealistic optimism<br>Identity                                                                                                                                    |
|                   | <b>Belief about consequences</b><br>(Acceptance of the truth, reality, or validity about outcomes of a behaviour in a given situation)                               | Beliefs<br>Outcome expectancies<br>Characteristics of outcome expectancies<br>Anticipated regret<br>Consequents                                                                              |
|                   | <b>Intentions</b><br>(A conscious decision to perform a behaviour or a resolve to act in a certain way)                                                              | Stability of intentions<br>Stages of change model<br>Transtheoretical model and stages of change                                                                                             |
|                   | <b>Goals</b><br>(Mental representations of outcomes or end states that an individual wants to achieve)                                                               | Goals (distal/proximal)<br>Goal priority<br>Goal/target setting<br>Goals (autonomous/controlled)<br>Action planning<br>Implementation intention                                              |
| <b>Automatic</b>  | <b>Reinforcement</b><br>(Increasing the probability of a response by arranging a dependent relationship, or contingency, between the response and a given stimulus)  | Rewards (proximal/distal, valued/not valued, probable/improbable)<br>Incentives<br>Punishment<br>Consequents<br>Reinforcement<br>Contingencies<br>Sanctions                                  |

|  |                                                                                                                                                                                                         |                                                                                           |
|--|---------------------------------------------------------------------------------------------------------------------------------------------------------------------------------------------------------|-------------------------------------------------------------------------------------------|
|  | <b>Emotion</b><br>(A complex reaction pattern, involving experiential, behavioural, and physiological elements, by which the individual attempts to deal with a personally significant matter or event) | Fear<br>Anxiety<br>Affect<br>Stress<br>Depression<br>Positive/negative affect<br>Burn-out |
|--|---------------------------------------------------------------------------------------------------------------------------------------------------------------------------------------------------------|-------------------------------------------------------------------------------------------|

### Reference

1. Cane J; O'Connor D; Michie S. Validation of the theoretical domains framework for use in behaviour change and implementation research. *Implement Sci* **2012**, 7.
